1           **Characterization of Vif domains that mediate Feline Immunodeficiency Virus**  
2                           **antagonism of APOBEC3-H and APOBEC3-CH restriction.**

3  
4   Olivia L. Sims<sup>1, 2, 3-4#a</sup>, Ernest L. Maynard<sup>5#b</sup>, and Eric M. Poeschla<sup>1,2,6#c\*</sup>

5  
6   <sup>1</sup>Department of Immunology, Mayo Graduate School, Mayo Clinic, Rochester, MN,  
7   United States of America

8  
9   <sup>2</sup>Department of Molecular Medicine, Mayo Clinic College of Medicine, Mayo Clinic,  
10   Rochester, MN, United States of America

11  
12   <sup>3</sup>Department of Virology and Immunology, Gladstone Institutes, San Francisco, CA,  
13   United States of America

14  
15   <sup>4</sup>Department of Medicine, San Francisco General Hospital, University of California San  
16   Francisco, San Francisco, CA, United States of America

17  
18   <sup>5</sup>Department of Biochemistry and Molecular Biology, Uniformed Services University of  
19   the Health Sciences, Bethesda, MD, United States of America

20  
21   <sup>6</sup>Department of Medicine (Division of Infectious Diseases), Mayo Clinic College of  
22   Medicine, Mayo Clinic, Rochester, MN, United States of America

23

24

25 \*Corresponding author

26 [olivia.sims@ucsf.edu](mailto:olivia.sims@ucsf.edu)

27

28 <sup>#a</sup>Olivia L. Sims: Gladstone Institute of Virology and Immunology, Gladstone Institutes,

29 San Francisco, CA; Department of Medicine, San Francisco General Hospital,

30 University of California, San Francisco, CA, E-mail: [olivia.sims@ucsf.edu](mailto:olivia.sims@ucsf.edu).

31

32 <sup>#b</sup>Ernest L. Maynard: Protein Characterization, Analytical Development, Novavax Inc.

33 Gaithersburg, MD, E-mail: [ernie.maynard@gmail.com](mailto:ernie.maynard@gmail.com).

34

35 <sup>#c</sup>Eric M. Poeschla: Division of Infectious Diseases, University of Colorado School of

36 Medicine, Aurora CO, E-mail: [eric.poeschla@ucdenver.edu](mailto:eric.poeschla@ucdenver.edu).

37

## 38 **Abstract**

39 Feline immunodeficiency virus (FIV) Vif mediates degradation of two anti-lentiviral feline  
40 APOBEC3 (fA3) proteins, fA3Z3 and fA3Z2bZ3. HIV-1 Vif targets the restriction factor  
41 human APOBEC3G (A3G, hA3Z2g-Z1c) for proteasome degradation to mediate viral  
42 evasion. Despite this similarity, FIV and HIV-1 Vif share limited homology. Vif binds  
43 hA3Z2g-Z1c through its N-terminal region, while its C-terminal region binds to an E3-  
44 ligase complex containing Cullin5 and Elongin B/C. Further, HIV-1 Vif contains critical  
45 domains in its C-terminus, including an adjacent BC box, the only shared domain  
46 between FIV and HIV-1 Vif, and a non-classical zinc finger (HCCH) domain. Felid  
47 lentivirus Vif, however, contains a highly conserved KCCC motif. While both Vifs have  
48 evolved to counteract select A3 antiretroviral proteins, the FIV Vif domains necessary to  
49 target fA3s for degradation are incompletely understood. To identify these domains, we  
50 used the well-characterized HIV-1 Vif domains to show that distinct mutations within the  
51 BC box of FIV Vif prevent fA3Z3 and fA3Z2bZ3 degradation and reduce virion  
52 infectivity. We also found that mutating any single residue in the KCCC motif blocked  
53 fA3 targeting and impaired FIV infectivity and replication. These mutations also failed to  
54 disrupt the FIV Vif and Cullin5 interaction. Further, we showed that, in contrast to the  
55 HCCH domain in HIV-1 Vif, the KCCC domain of FIV Vif does not bind zinc. However,  
56 unlike HIV-1 Vif, FIV Vif (C36 isolate) reduces intracellular levels of co-expressed  
57 Cullin5 proteins, a novel finding. Our results reveal important C-terminal residues in FIV  
58 Vif and show that the BC box and KCCC regions are critical for fA3 degradation,  
59 infectivity, and spreading replication.

60

## 61 Introduction

62 Lentiviruses cause chronic degenerative diseases in primate, ungulate, and  
63 feline species. The current AIDS pandemics in *Homo sapiens* and *Felis catus* are  
64 caused by human immunodeficiency virus type-1 (HIV-1) and feline immunodeficiency  
65 virus (FIV), respectively. All primate and non-primate lentiviruses encode a Vif protein,  
66 except the equine virus (1), that is essential for viral replication. HIV-1 Vif counters the  
67 antiviral activity of human APOBEC3G (A3G, hA3Z2g-Z1c) (2-11). In the absence of Vif,  
68 hA3Z2g-Z1c incorporates into virion particles of the virus-producing cell, where it inhibits  
69 viral replication by cytidine deamination of the viral minus-strand cDNA. This  
70 mechanism produces a plus-strand G-to-A hypermutation and interference during  
71 reverse transcription (4, 12-15).

72 A3 proteins, such as hA3Z2g-Z1c, are targeted to the proteasome for  
73 degradation (2, 16-22) via a Vif-dependent mechanism. The N-terminus of HIV-1 Vif, the  
74 <sup>14</sup>DRMR<sup>17</sup> and <sup>40</sup>YHHY<sup>44</sup> motifs (23-26), mediates the interaction with hA3Z2g-Z1c.  
75 However, the C-terminal region of Vif coordinates recruitment of a cellular E3 ligase  
76 complex consisting of Cullin5 (Cul5), Elongin C, Elongin B, an E2 ligase, and a Ring box  
77 (Rbx) protein (2, 5, 6, 18, 27). Recruitment of the E3 ligase occurs via several  
78 evolutionarily conserved domains in Vif, including a non-classical zinc-finger domain  
79 that binds to Cul5, SOCS (suppressors-of-cytokine-signaling-like domain) box, BC box,  
80 that interacts with Elongin C (2, 5-9, 15, 28-30), and a PPLP domain that interacts with  
81 Elongin B (1, 6, 31). While there are seven different human Cullin proteins (32, 33), HIV-  
82 1 Vif selectively interacts with Cul5 to stabilize the E3 ligase complex (2).

83           The half-life of both HIV-1 and simian immunodeficiency virus (SIV) Vif is  
84 stabilized and extended by core-binding factor- $\beta$  (CBF- $\beta$ ) (34), which promotes the  
85 interaction between HIV-1/SIV Vif and Cul5 needed to form the E3-ligase complex (27,  
86 35-39). The interface that mediates CBF- $\beta$  binding to and stabilization of Vif were solved  
87 using the Vif/CBF- $\beta$ /Cul5/Rbx2/EloBC and, separately, the Vif/CBF- $\beta$ /N-terminal  
88 hA3Z2g-Z1c/EloBC complexes with X-ray crystallography and NMR spectroscopy,  
89 respectively (37, 40). CBF- $\beta$  forms multiple interactions with the HIV-1 Vif N- and C-  
90 terminus, particularly with the BC box and HCCH domains (40-42). Mutating HCCH  
91 residues prevents the HIV-1 Vif/CBF- $\beta$ /hCul5 interaction and significantly suppresses  
92 hA3Z2g-Z1c antiviral activity (41).

93           Non-primate mammals also encode antiviral APOBEC3 proteins (11, 43-50). Two  
94 *Felis catus* A3 proteins, fA3Z3 (fA3H) and fA3Z2bZ3 (fA3CH), restrict  $\Delta$ vif FIV (11, 43-  
95 46), a FIV vif-deletion mutant. FIV Vif promotes HIV-1 replication by mediating  
96 degradation of fA3Z3 or fA3Z2bZ3 when expressed in *cis* (45, 46) or *trans* (45) in  
97 Crandall-Rees Feline Kidney (CrFK) cells. FIV Vif also recruits an E3-ligase complex  
98 containing Cul5, EloC, and EloB (51). Although FIV Vif lacks the HCCH motif, a region  
99 adjacent to the BC box contains a strongly conserved KCCC motif (Fig. 1A) (45) that  
100 (45, 51) may serve as an atypical putative zinc-binding domain. Other lentiviral proteins  
101 contain an atypical zinc finger, such as the HIV-1 nucleocapsid (NC), that is important  
102 for transferring DNA intermediate strands during reverse transcription (52-54).  
103 Additionally, FIV Vif interacts with human and feline Cul5 (fCul5) (51); however, the  
104 residues governing the interaction between Vif and Cul5 are different between HIV-1  
105 and FIV Vif. Indeed, replacing the two most C-terminal cysteine residues in the KCCC

106 motif of FIV Vif with serine (KCSS) no longer rescues  $\Delta$ Vif HIV-1 infectivity in the  
107 presence of fA3 proteins, despite maintaining the interaction between FIV Vif and Cul5  
108 (51).

109 The zinc chelator PTEN (N, N, N', N'-tetrakis-(2-pyridylmethyl)-ethylenediamine)  
110 further distinguishes FIV from HIV-1. PTEN disrupts the interaction between HIV-1 Vif  
111 and hCul5, but not between FIV Vif and fCul5, suggesting that FIV Vif might not be a  
112 bona fide zinc-binding protein (9, 29, 51). However, PTEN can chelate iron and copper  
113 (albeit it has a greater affinity for copper) and alter their cellular levels (55-57). While  
114 earlier data suggested that FIV Vif does not bind zinc, biochemical data using purified  
115 proteins were needed to verify this notion. Because HIV-1 NC has a non-canonical zinc  
116 motif, we posited that the KCCC domain in FIV Vif might be the major zinc-binding site  
117 and may mediate a functionally important Vif-Cul5 interaction. To test this hypothesis,  
118 we interrogated the biomolecular interactions between FIV Vif and Cul5 using  
119 isothermal titration calorimetry with and without zinc. Our studies were designed to  
120 decipher whether FIV Vif is a zinc-binding protein and whether additional determinants  
121 in the BC box and KCCC domain are essential for this interaction.

122  
123  
124

125

## 126 **Materials and Methods**

### 127 **Cells**

128 293T and CrFK cells were obtained from the American Type Culture Collection (ATCC).

129 Cells were cultured in high-glucose Dulbecco's Modified Eagle Medium (DMEM) with

130 10% fetal bovine serum, 1% penicillin/streptomycin, and L-glutamine.

131

### 132 **Plasmids**

133 The expression plasmid containing codon-optimized wild-type (WT) FIV Vif C36 tagged

134 with a hemagglutinin (HA) epitope (FIV C36 Vif-HA) was generated as previously

135 described (45). Primer pairs (Table 1) were used for site-directed mutagenesis within

136 FIV C36 HA-tagged Vif using sense and antisense primers to generate the following FIV

137 Vif mutants: TLQ/AAA, TLQ/TAQ, A205L, A205S, A205T, K157R, C161S, and C187S.

138 To generate the FIV Vif KCCC/RSSS mutant, a multisite-directed mutagenesis kit

139 (Invitrogen) was used with two sense primers outlined in the primer table. Overlap-

140 extension PCR deleted the KCCC domain using FIV C36 Vif-HA as a template with the

141 outer sense (OS) and inner antisense (IAS) primers to generate the first PCR product.

142 The second PCR reaction used the inner sense (IS) and outer antisense (OAS) primers.

143 Combined PCR products were amplified with OS and OAS primers to generate  $\Delta$ KCCC

144 FIV C36 Vif-HA. PCR products were ligated into p1012 using EcoRI and KpnI restriction

145 sites. The expression plasmid containing VR1012 human Cul5 Myc was a generous gift

146 from Dr. Xiao Fang Yu at John Hopkins University School of Public Health (2).

147 Construction of expression plasmids containing fA3Z3 and fA3Z2bZ3 FLAG was  
 148 previously described (45). The VR1012 feline Cul5 Myc was a generous gift of Dr. Yu  
 149 (51). All expression plasmids were verified by Sanger DNA sequencing.

150 **Table 1. Primer Sequences to Generate FIV Vif Expression Plasmids.**

| Name          | Primer Sequences for FIV Vif Mutants                                                                 |
|---------------|------------------------------------------------------------------------------------------------------|
| TLQ/AAA       | 5' TCTCCACCCGGCGCCGCGCCGCCCCGCTGGCCATG<br>3' CATGGCCAGGCGGGCGGCGGCGCCGGGTGGAGA                       |
| TLQ/TAQ       | 5' CCACCCGGCACTGCCAACGCCTGGCCATGCTGGCCTGTGGCC<br>3' GGCCACAGGCCAGCATGGCCAGGCGTTGGGCAGTGCCGGGTGG      |
| A205L         | 5' CCACCCGGCACTCTGCAACGCCTGCTGATGCTGGCCTGTGGCCGC<br>3' GCGGCCACAGGCCAGCATCAGCAGGCGTTGCAGAGTGCCGGGTGG |
| A205S         | 5' CCACCCGGCACTCTGCAACGCCTGTCCATGCTGGCCTGTGGCCGC<br>3' GCGGCCACAGGCCAGCATGGACAGGCGTTGCAGAGTGCCGGGTGG |
| A205T         | 5' CCACCCGGCACTCTGCAACGCCTGACCATGCTGGCCTGTGGCCGC<br>3' GCGGCCACAGGCCAGCATGGTCAGGCGTTGCAGAGTGCCGGGTGG |
| K157R         | 5' GGCATGGTTGGTATCGCAATCCGCGCCTTCTCCTGCGGGGAGCGC<br>3' GCGCTCCCCGCAGGAGAAGGCGCGGATTGCGATACCAACCATGCC |
| C161S         | 5' ATCGCAATCAAAGCCTTCTCCTCCGGGGAGCGCAAATTGAAGCA<br>3' TGCTTCAATTTTGCCTCCCCGGAGGAGAAGGCTTTGATTGCGAT   |
| C184S         | 5' GAAATTGATCCGAAAAAATGGTCCGGCGACTGCTGGAACCTGATG<br>3' CATCAGGTTCCAGCAGTCGCCGACCATTTTTTCGGATCAAT TTC |
| C187S         | 5' CCGAAAAAATGGTGCGGCGACTCCTGGAACCTGATGTGCCTGCGC<br>3' GCGCAGGCACATCAGGTTCCAGGAGTCGCCGCACCATTTTTTCGG |
| KCCC/RSSS     | 5' GGTGGTATCGCAATCCGCGCCTTCTCCTCCGGGGAGCGCAAATTG<br>5' GATCCGAAAAAATGGTCCGGCGACTCCTGGAACCTGATGTGC    |
| $\Delta$ KCCC | <i>Overlap Extension Primers to Generate FIV Vif <math>\Delta</math>KCCC Mutant</i>                  |
| OS            | 5' ATATATGAATTCCACCACACTGGACTAGTGGATCCATGGG                                                          |
| IAS           | 3'GCAGGCACATCAGGTTCCAGATTGCGATACCAACCATGCCCGGCCCCC<br>AG                                             |
| IS            | 5' GCATGGTTGGTATCGCAATCTGGAACCTGATGTGCCTGCGCAATTCTCC                                                 |
| OAS           | 3' ATATATGGTACCCATAGAGCCCACCGCATCCCCAGCATGC                                                          |

151  
 152  
 153 **Construction of Vif-Mutant Infectious Molecular Clones**  
 154  
 155 **Generation of 34TF10 C184S\_187S Vif.** The human cytomegalovirus driven infectious  
 156 molecular clone 34TF10 (CT5) (58) containing a functional Orf2 was subcloned into  
 157 pcDNA3.1(-) using EcoRI and KpnI (pcDNA3.1-CT5). pcDNA3.1-CT5 has a partial



158 fragment of Gag and full length Pol, Vif, and Orf2 genes (hereafter referred to as  
159 pcDNA3.1-CT5Vif) (58). To introduce the C184\_187S mutation into pcDNA3.1(-)  
160 CT5Vif, the OS and IAS primers were used to generate the first PCR amplicon. The  
161 second PCR product was synthesized with OAS and IS primers. Combined PCR  
162 products were amplified with the OS and OAS primers, and the overlap product was  
163 inserted into pCT5 with AcclII and KpnI.

164

165 **Creation of KCCC/RSSS.** To construct KCCC/RSSS, the C184\_187S amplicon  
166 described above was ligated into pcDNA3.1(-) empty vector using EcoRI and KpnI. To  
167 generate KCCC/RSSS Vif, the pcDNA3.1-C184S\_187S Vif plasmid and OS and IAS  
168 primers were used to amplify the first PCR product. The pcDNA3.1-C184\_187S plasmid  
169 and OAS primer and the IS primers generated the second PCR amplicon. Combined  
170 PCR products were amplified using OS and OAS primers to generate the CT5 Vif  
171 KCCC/RSSS. The KCCC/RSSS PCR product was ligated into CT5 with AcclII and KpnI.

172

173 **Creation of 34TF10 TLQ/AAA Vif.** To generate the TLQ/AAA Vif mutant, the pcDNA  
174 3.1-CT5 Vif plasmid and the OS and IAS primers were used to amplify the first PCR  
175 product. The pcDNA3.1-CT5 Vif template and OAS and IS primers were used to amplify  
176 the second PCR product. Combined PCR products were amplified with OS and OAS  
177 primers to generate the TLQ/AAA amplicon. The TLQ/AAA PCR product was ligated  
178 into CT5 with AcclII and KpnI.

179 **Creation of 34TF10  $\Delta$ KCCC\_TLQ/AAA Vif.** To generate the  $\Delta$ KCCC\_TLQ/AAA Vif  
180 mutant, the CT5 TLQ/AAA amplicon was ligated into pcDNA3.1(-) using EcoRI and

181 KpnI. The CT5 TLQ/AAA CT5 Vif template and OS and IAS primers were used to  
 182 amplify the first PCR product. The second PCR product was amplified using the CT5  
 183 TLQ/AAA CT5Vif template DNA with OAS and IS primers. Combined PCR products  
 184 were amplified using OS and OAS primers to generate the full-length  $\Delta$ KCCC\_TLQ/AAA  
 185 Vif amplicon. The primers used to generate mutants with overlap-extension PCR are  
 186 listed in Table 2. All mutants were verified by Sanger DNA sequencing.

187

188 **Table 2. Overlap-Extension Primers to Generate Molecular Clones of Vif Mutant**

189 **CT5.**

| Name                                  | Mutant CT5 Primers Sequences                                |
|---------------------------------------|-------------------------------------------------------------|
| <b>C184/187S</b>                      |                                                             |
| OS                                    | ATAT TCCGGATGAAAGAGAAAAGTATAAAAAAGAC                        |
| IAS                                   | ACACATTAATTCCATGAATCTCCTGACCATTTTTTTGGATC                   |
| IS                                    | GATCCAAAAAATGG TCA GGAGAT TCA TGGAATTTAATGTGT               |
| OAS                                   | ATAT GGTACC CTAATGGGTTTACTCCTGGATTTAG                       |
| <b>KCCC/RSSS</b>                      |                                                             |
| OS                                    | ATAT TCCGGATGAAAGAGAAAAGTATAAAAAAGAC                        |
| IAS                                   | CTTTCTTTCGCCTGAACTAAAAGCGCGTATTGCTATACC                     |
| IS                                    | GGTATAGCAATA CGC GCTTTTAGT TCA GGCGAAAGAAAG                 |
| OAS                                   | ATAT GGTACCCTAAATGGGTTTACTCCTGGATTTAG                       |
| <b>TLQ/AAA</b>                        |                                                             |
| OS                                    | ATAT TCCGGATGAAAGAGAAAAGTATAAAAAAGAC                        |
| IAS                                   | CATAGCGAGTCTAGCAGCAGCCTTTGGAGGTG                            |
| IS                                    | CACCTCCAAAGGCTGCTGCT AGACTCGCTATG                           |
| OAS                                   | ATAT GGTACCCTAAATGGGTTTACTCCTGGATTTAG                       |
| <b><math>\Delta</math>KCCC_TLQ/AA</b> |                                                             |
| OS                                    | ATAT TCCGGATGAAAGAGAAAAGTATAAAAAAGAC                        |
| IAS                                   | GTTTCTAAGACACATTAATTCCATATTGCTATACCTACCATCC<br>CTGGTCCCAT   |
| IS                                    | GGATGGTAGGTATAGCAATATGGAATTTAATGTGTCTTAGAACTCACC<br>TCCAAAG |
| OAS                                   | ATATGGTACC CTAATGGGTTTACTCCTGGATTTAG                        |

190

191

192

## 193 **Cloning, Expression and Purification of Recombinant FIV C36 Vif**

194 Expression constructs containing FIV C36 Vif (residues 156–200 and 156–213) were  
195 generated by insertion into the EcoRI-Sbf I site of pMal c-5X (NEB). The resulting  
196 mannose-binding protein (MBP)-Vif fusion proteins were expressed and purified as  
197 previously described (59). Purified fusion proteins were concentrated in 20 mM HEPES  
198 pH 7.4, 150 mM NaCl, and 200  $\mu$ M Tris (2-carboxyethyl) phosphine and used  
199 immediately for zinc-binding studies.

200

## 201 **ITC Analysis of Zinc Binding to Recombinant FIV C36 Vif**

202 Isothermal titration calorimetry (ITC) experiments were performed at 25°C using a  
203 MicroCal iTC200 microcalorimeter (GE Healthcare) with a stirring rate of 1000 rpm.  
204 Complete details of the ITC assay have been described (59). Briefly, purified FIV Vif  
205 proteins were loaded into the ITC cell. A standardized stock solution of  $\text{Zn}(\text{NO}_3)_2$  was  
206 loaded in the ITC syringe and injected step-wise into the cell. After the first injection of  
207 0.4  $\mu$ l  $\text{Zn}(\text{NO}_3)_2$ , 19 additional injections of 2  $\mu$ L were made into the cell at 2 minute  
208 intervals to allow the system to return to equilibrium. Data were analyzed using  
209 MicroCal Origin software.

210

## 211 **Western Blotting**

212 Following washing and trypsinization, cells lysates were obtained by suspending cell  
213 pellets in a volume of 10  $\mu$ l per 100,000 cells with protease inhibitor (Complete-Mini,  
214 Roche) and an equivalent volume of 6X Laemmli buffer per sample. Lysates were  
215 boiled and clarified. Proteins were resolved on a sodium dodecyl sulfate–polyacrylamide

216 electrophoresis (SDS-PAGE) gel and transferred to a polyvinylidene fluoride (PVDF)  
217 membrane (Thermo Scientific). Membranes were blocked in 10% milk and probed with  
218 primary antibodies. Membranes were incubated with appropriate secondary HRP-  
219 conjugated antibodies (dilutions 1: 5000–1:10000). Chemiluminescent substrates were  
220 used for visualization (Thermo Scientific 34080 or 34095).

221

## 222 **Western Antibodies**

223 Rat anti-HA (Roche, high-affinity clone 3F10), rabbit anti-HA (Santa Cruz), mouse anti-  
224 HA (Sigma H3663), polyclonal rabbit anti-Myc (Santa Cruz), rabbit anti-tubulin (Santa  
225 Cruz Product 9104), and mouse anti-Flag (Sigma F3165) antibodies were used at a  
226 dilution between 1:500 and 1:1000.

227

## 228 **Proteasome Inhibition**

229 Plasmid DNAs were transfected into 293T cells using calcium phosphate co-  
230 precipitation and medium was changed 12–16 hours later. Cells were treated with  
231 dimethyl sulfoxide (DMSO) or 10  $\mu$ M MG132 (Sigma) 48 hours post-transfection, and  
232 cell lysates were harvested 22–24 hours later. Proteins were separated via SDS-PAGE  
233 as previously described.

234

## 235 **Co-Immunoprecipitation**

236 Co-transfections of 293T cells were performed as above. Transfection media was  
237 replaced with DMEM 12–16 hours later. Then, 48–52 hours post-transfection, cells were

238 washed with ice-cold PBS and lysed with ice-cold lysis buffer [150 mM NaCl, 50 mM  
239 TRIS HCl (pH 7.5), 1% Triton X, complete mini-protease inhibitor (Roche, Germany),  
240 and 200 mM phosphatase inhibitor (Sigma: Sodium Pervanadate)]. Sheep anti-mouse  
241 Immunoglobulin (Ig) magnetic dynabeads (sheep anti-mouse IgG, Invitrogen cat  
242 no.110.31; Oslo, Norway) were blocked with 0.01% bovine serum albumin (BSA) and 2  
243 mM EDTA. Cell lysates were stored at -20°C. To eliminate non-specific binding, beads  
244 were incubated with cell lysates at 4°C for 1 hour. Beads from previous adsorption were  
245 discarded, and lysate were incubated with 1.0 µg mouse anti-HA antibody (Sigma  
246 H3663) to immunoprecipitate HA-tagged proteins. Pre-cleared lysates were incubated  
247 with 30 µl of pre-blocked dynabeads for 1 hour. Beads were washed three times with  
248 ice-cold co-immunoprecipitation lysis buffer. Immune complexes were eluted from  
249 beads with 30 µl of 2X β-mercaptoethanol Laemmli sample buffer and boiled at 95°C for  
250 9 minutes. Proteins were separated by SDS-PAGE. Immunoblots were probed with a  
251 polyclonal rabbit antibody directed against the Myc epitope to assess the interaction  
252 between feline Cul5 Myc and FIV Vif HA-tagged (WT or mutant) proteins.

253

## 254 **Immunofluorescence**

255 The 293T cells were seeded onto Nunc LabTEK II chamber slides (Thermofisher,  
256 Catalog Number 154461). Adhered 293T cells were transfected with Fugene (Roche).  
257 Then, 48 hours post-transfection, cells were fixed with 4% formaldehyde, washed with  
258 PBS, and perforated with ice-cold methanol. Cells were stained with primary antibodies  
259 against HA- (high-affinity rat anti-HA antibody; Roche) or Myc- (rabbit anti-Myc; Santa  
260 Cruz) tagged proteins and probed with secondary antibodies goat anti-rabbit Alexa

261 Flour (AF) 488 or goat anti-rat AF 594 (Invitrogen) to analyze cellular distribution of  
262 proteins. Cells were stained with prolonged gold DAPI (Invitrogen) and mounted with a  
263 glass coverslip. All images were taken with a 510 laser-scanning confocal microscope  
264 (LSM 510).

265

## 266 **Single-Cycle FIV-Replication Assays**

267 The 293T producer cells were co-transfected using the calcium phosphate method with  
268 the following plasmids: transfer (FIV human cytomegalovirus (CMV)–driven luciferase  
269 reporter) (60), vesicular stomatitis virus glycoprotein (VSV-G), FP93 packaging (express  
270 FIV: gag, pol, and rev, but lacks Vif and envelope proteins) (61), fA3s (either fA3Z3 or  
271 fA3Z2bZ3), and codon-optimized FIV C36 Vif-HA (WT or mutant; or empty vector  
272 parental control) plasmids. Then, 16–20 hours post-transfection, media was changed;  
273 supernatants were collected with a 0.45  $\mu$ M filter 32 hours later. Freshly plated 293T  
274 cells were transduced with equal amounts of virus normalized to reverse transcriptase  
275 (RT). Media was changed 16–20 hours after infection. Seventy-two hours post-infection,  
276 supernatants were removed, cells were washed with PBS, and then lysed with 1%  
277 Tween. Quantification of luciferase activity was measured by the relative light units  
278 emitted from each sample. Error bars reflect standard deviation from the mean.

279

## 280 **Spreading Replication**

281 The 293T producer cells were transfected with infectious molecular clones of WT or  
282 mutant 34TF10 Orf2 (CT5) using polyethylenimine (PEI) transfection reagent (Salk

283 Institute). To boost first-round infectivity, vesicular stomatitis virus glycoprotein G (VSV-  
284 G) was co-expressed during production. Media was changed 6–8 hours later. Viruses  
285 were harvested, filtered (0.45  $\mu$ M), and pelleted on a 20% sucrose cushion 48 hours  
286 post-transfection. Viral titers were determined using a focal infectivity assay (FIA).  
287 Freshly plated CrFk cells were infected, and 12–16 hours later, they were washed  
288 thoroughly to eliminate input virus. Every 72 hours, viral supernatant was harvested.  
289 Simultaneously, feline cells were divided, cultured, and passaged with fresh media. The  
290 RT activity of viral supernatants was determined as previously described (62).

291

## 292 **FIV Focal Infectivity Assay**

293 The focal infectivity assay (FIA) assay has been previously described (63). In brief,  
294 CrFK cells were serially infected in 24-well plates. Sixteen hours post-infection, media  
295 was changed, and 40–42 hours post-infection, cells were washed and fixed with  
296 methanol. Cells were washed with 1X TNE (15.8 g Tris-HCl, 87 g NaCl, 7.44 g EDTA,  
297 700 ml H<sub>2</sub>O pH to 7.5.), blocked (1X TNE, 10% FBS), and probed with PPR antisera (a  
298 generous gift from Peggy Barr) and goat anti-cat HRP secondary antibody (MP  
299 Biomedicals 55293). Cells were stained with aminoethyl carbazol (AEC Sigma A-6926)  
300 solution to visualize infected cells. Infected cells were counted with a hemocytometer to  
301 empirically determine the viral titer.

## 302 Results

### 303 Vif mutations affect fA3 protein degradation

304 Given that fA3Z2bZ3 is more active than fA3Z3 in preventing □Vif FIV replication (44-  
305 46), we used fA3Z2bZ3 in the majority of our experiments. We initially tested fA3Z2bZ3  
306 with FIV Vif C36 harboring mutations in the BC box (TLQ/AAA, TLQ/TAQ, A205L,  
307 A205S, and A205T) and KCCC motif (K162R, C166S, C189S, C192S, KCCC/RSSS,  
308 and ΔKCCC) (Fig 1A and 1B). Wild-type (WT) and mutant FIV Vif proteins had similar  
309 intracellular patterns (Fig 1C) and expression levels (Fig 1D). In contrast, BC-box  
310 mutants TLQ/AAA, TLQ/TAQ, and A205L lost A3-degradative function (Fig 2A and B),  
311 while A205S and A205T maintained their function. Moreover, all KCCC mutants failed to  
312 direct fA3 degradation (Fig 2C and 2D). Treatment with the proteasome inhibitor MG132  
313 partially rescued degradation of FIV Vif-mediated fA3Z2bZ3 and HIV-1 Vif-mediated  
314 hA3Z2g-Z1c (Fig 2E and 2F). Notably, Vif was poorly expressed when co-transfected  
315 with fA3Z2bZ3 and hA3Z2g-Z1c in DMSO-treated cells (Fig 2E). These findings suggest  
316 that Vif might be degraded when complexed with A3 proteins, consistent with rapid  
317 turnover of Vif and concomitant degradation when associated with A3 proteins (51, 64).

318

#### 319 Fig 1. Vif protein alignments, mutations, cellular locations and expression levels.

320 A, Amino-acid alignment of the C-terminus of HIV, SIVagm, and FIV Vif. B, FIV Vif C36  
321 mutants. C, 293T cells were transfected with HA-tagged wild-type (WT) or mutant Vif  
322 with or without FLAG-tagged fA3Z2bZ3. Cells were subjected to immunofluorescence  
323 with antibodies to the respective epitope tags to visualize the cellular distribution of FIV  
324 Vif or fA3Z2bZ3 proteins alone (top row, left column) or together. Cellular DNA was



325 stained with DAPI. *D*, Immunoblots demonstrating equivalent expression of HA-tagged  
326 FIV Vif mutants.

327

## 328 **Vif mutations influence viral infectivity**

329 To determine whether loss of fA3 degradation correlates with increased restriction, we  
330 produced a virus containing a  $\Delta vif$  FIV reporter both with and without fA3Z2bZ3 and the  
331 various Vif proteins. Consistent with their ability to target fA3Z2bZ3 for degradation (Fig  
332 2A), A205S and A205T rescued FIV infectivity by 50% in the presence of fA3Z2bZ3 (Fig  
333 3A). In contrast, TLQ/AAA, TLQ/TAQ, and A205L reduced FIV infectivity by 80% in the  
334 presence of fA3Z2bZ3 (Fig 3A). None of the KCCC mutants counteracted fA3Z2bZ3's  
335 antiviral activity (Fig 3B). We confirmed the correlation between fA3 levels and infectivity  
336 with immunoblotting (Fig 3A and 3B). These data reveal novel residues within the BC  
337 box (TAQ, A205L, A205S, and A205T) and KCCC domain (K162R, C166S, C189S,  
338 C192S, KCCC/RSSS, and  $\Delta$ KCCC) that are required for FIV Vif activity against fA3s  
339 and viral infectivity.

340

341 **Fig 2. Effects of FIV Vif mutations on fA3 protein degradation.** *A* and *B*, Specific FIV  
342 Vif BC-box mutants target fA3s for destruction. 293T cells were co-transfected with 0.5  
343  $\mu$ g untagged p1012, wild-type (WT) or mutant FIV Vif HA, and 1  $\mu$ g of untagged  
344 pcDNA3.1(-) or FLAG-tagged fA3 (fA3Z3 or fA3Z2bZ3). Protein separation was  
345 analyzed by SDS-PAGE. Immunoblot membranes were probed with antibodies  
346 recognizing HA, FLAG, or tubulin proteins. *C* and *D*, FIV Vif with mutations in the BC  
347 box were unable to target fA3s for degradation. 293T cells were co-transfected with or

348 without fA3s or untagged parental empty vectors with similar ratios of plasmid DNA as  
349 detailed in Fig 2A and 2B. A separate set of experiments showed FIV Vif mediates  
350 fA3Z2bZ3 proteasomal degradation. *E* and *F*, 293T cells were co-transfected with 0.5  
351  $\mu\text{g}$  of p1012 and 1  $\mu\text{g}$  fA3Z2bZ3 or pcDNA3.1 (-) hA3Z2g-Z1c expression plasmids with  
352 0.5  $\mu\text{g}$  of WT FIV Vif or HIV-1 Vif with DMSO or MG132.

353

354 **Fig 3. Effects of FIV Vif mutants on fA3CH restriction.** *A* and *B*, Reporter viruses  
355 containing FIV  $\Delta$ Vif were produced in 293T cells transfected with 0.4  $\mu\text{g}$  transfer vector,  
356 0.2  $\mu\text{g}$  pFP93 (FIV Gag-Pol and Rev) packaging vector, 0.2  $\mu\text{g}$  pMD.G (VSV-G), with or  
357 without 0.3  $\mu\text{g}$  of fA3Z2bZ3-FLAG and/or 0.5  $\mu\text{g}$  Vif-HA [wild-type (WT) or mutant]  
358 plasmids, or the empty p1012 parental plasmid. The reverse transcription (RT) activity  
359 of each viral supernatant was determined, and equivalent amounts of RT-normalized  
360 virus were used to infect freshly plated 293T cells. Seventy-two hours after infection,  
361 lysates were analyzed for luciferase activity in triplicate. Standard deviation between  
362 triplicate samples was determined. FIV alone was set as 100%.

363

### 364 **Vif mutations alter spreading replication**

365 We then introduced four Vif mutants (KCCC/RSSS,  $\Delta$ KCCC+TLQ/AAA, TLQ/AAA, and  
366 C184+187S) into the full-length CT5 molecular clone to determine their effects on  
367 spreading viral replication. We chose these mutants because all of the KCCC mutants  
368 were defective for single-round infectivity. Stocks of mutant FIV virus were produced in  
369 293T cells and tested in CrFk cells. All four mutants exhibited similar reverse  
370 transcriptase (RT) activities (Fig 4A), as 293T cells lack antiviral hA3 activity, and they

371 did not negatively impact the infectious titer of the viruses (Fig 4B). Next, we infected  
372 CrFK cells with WT or mutant viruses at MOIs of 0.01 and 0.1. None of the four mutant  
373 viruses could replicate, while the WT virus replicated at 0.01 MOI, with large amounts of  
374 RT activity at 0.1 MOI (Fig 4C and 4D).

375

376 **Fig 4. Effects of FIV Vif mutants block spreading replication of FIV.** 293T producer  
377 cells were transiently transfected with VSVG-pseudotyped wild-type (WT) FIV or FIV  
378 Vif-mutant molecular clones (pCT5-based). A and B, Reverse transcription (RT) activity  
379 of viral supernatants and titers. C and D, Spreading replication:  $4.5 \times 10^4$  CrFK cells  
380 were infected at two different MOIs (0.01 and 0.1). Every 72 hours, viral supernatant  
381 was collected and stored at  $-80^\circ\text{C}$  until RT activity was determined.

382

### 383 **Mutant Vif proteins co-localize and interact with feline Cul5**

384 To date, the intracellular distribution of feline Cul5 (fCul5) has not been well  
385 characterized. Using confocal microscopy, we found fCul5 predominately in the  
386 cytoplasm, similar to Vif (Fig 5A). The KCCC mutants also display a slight intra-nuclear  
387 presence, in agreement with HIV-1 Vif, which has been shown to have a minimal Vif  
388 nuclear localization (65, 66). Co-immunoprecipitation studies assessed which FIV Vif  
389 domains were responsible for the interaction with Cul5. While the KCCC mutants  
390 interacted with fCul5 (Fig 5C, lanes 6–7), the TLQ/AAA mutant interacted poorly with  
391 fCul5 (Fig 5C, lane 8), as previously reported (51). Notably, when WT or mutant FIV Vif  
392 was co-expressed with fCul5 or hCul5, Cul5 expression significantly decreased (Fig 5B,  
393 lanes 5–8). As a result, less FIV Vif proteins were immunoprecipitated (Fig 5C, lanes 5–

394 8), an effect not observed if hCul5 and HIV-1 Vif are co-expressed (Fig 5B, lane 4).  
395 Despite multiple attempts, we were unable to detect an interaction between feline  
396 Elongin B and C (fEloB and fEloC, respectively) in the presence of FIV Vif and fCul5.  
397 The latter may be due to reduced Cul5, which could have limited detection of the FIV  
398 Vif/E3 ligase constituents (e.g., fEloB and fEloC). Nonetheless, with these data, we  
399 verified the FIV Vif/fCul5 interaction reported by Wang and colleagues (51).

400

401 **Fig 5. The FIV Vif KCCC domain does not mediate fCul5 interaction.** A, 293T cells  
402 were co-transfected with 1 µg feline Cul5-Myc plasmid and 1 µg wild-type (WT) or  
403 mutant FIV Vif-HA plasmid using PEI. Then, 48 hours later, cells were immunolabeled  
404 and imaged using confocal microscopy. B, Cell lysates from 293T cells co-transfected  
405 with 3 µg of each expression plasmid were analyzed 48 hours post-transfection C,  
406 Protein-protein interactions. Lysates were immunoprecipitated with mouse anti-HA, and  
407 then incubated with sheep anti-mouse beads. Immune complexes were eluted and  
408 subjected to SDS-PAGE. Immunoblots were probed with a rabbit anti-Myc antibody to  
409 evaluate the interaction between fCul5-Myc and WT or mutant FIV Vif-HA proteins.

410

## 411 **Analysis of zinc binding to FIV Vif**

412 A HCCH C-terminal motif in primate Vif proteins binds zinc and is required for Cul5  
413 recognition. Feline Vifs have a similarly positioned KCCC motif. With isothermal titration  
414 calorimetry (ITC), we evaluated whether the KCCC domain of FIV Vif also binds zinc  
415 (59). FIV Vif proteins (Fig 6A) were expressed (Fig 6B) from the pMal-c5X vector and  
416 purified. All mannose binding protein (MBP)-Vif constructs showed no evidence of

417 protein degradation (Fig 6B). Further, with size-exclusion chromatography, we  
418 separated and determined the protein quality of the purified MBP-Vif mutants. Notably,  
419 most of the N-terminal constructs did not bind to the amylose resin, suggesting that they  
420 may have formed aggregates that were unable to bind to the matrix (Fig 6C). Only two  
421 MBP-Vif mutants were monomeric (Fig 6D and 6E), as the rest formed aggregates (Fig  
422 6D). Because protein aggregates can impair the biological function of a protein (67), the  
423 monomeric peaks that contained the intact KCCC-domain and BC-box motifs (156–  
424 213), as well as the domain that lacks the BC-box motif (156–200), were collected,  
425 concentrated, and analyzed further by ITC.

426

427 **Fig 6. Expression, Purification, and Size Exclusion of FIV Vifs.** A, Schematic map  
428 and numbering of purified and codon-optimized FIV<sub>C36</sub> Vif. B, Expression of pre- and  
429 post-induction samples analyzed by SDS-PAGE. C, Verification of size exclusion  
430 chromatography SEC elutant and supernatant alongside pre- and post-induction  
431 samples were analyzed by SDS-PAGE. For each construct, the first lane is the induced  
432 (I) sample from Fig 6B, the second lane is the supernatant (S), the third lane is the  
433 unbound (U) flow-thru from the amylose column, and the fourth lane is the protein that  
434 bound (B) to and was eluted from the amylose column. D, Table of elution volumes and  
435 folding status of purified Vif MBP proteins. E, Monomeric resolution of purified Vif  
436 proteins (156–213 and 156–200) at 17 mL.

437

438 MBP-Vif proteins were concentrated in buffer containing excess reductant (tris-  
439 carboxyethyl phosphine) to maintain Cys residues in the thiol state. These thermogram

440 data indicate that zinc failed to bind to either FIV Vif construct (Fig 7A and 7B),  
441 consistent with a recent study in which the zinc chelator PTEN failed to inhibit fA3  
442 degradation by FIV Vif (51). These results suggest that FIV Vif must degrade fA3  
443 proteins via a mechanism distinct from that of the zinc-binding primate Vif.

444 **Fig 7. Isothermal titration calorimetry data for zinc titrations into FIV C36 Vif. A**  
445 and *B*, Integrated heat data for MBP-Vifs (156–200 and 156–213, respectively).

446

447

448

## 449 **Discussion**

450           With our data, we revealed novel residues within the FIV Vif BC box and KCCC  
451 domain that are required for infectivity and fA3 degradation. We also verified that the  
452 KCCC domain does not mediate the interaction with Cul5. In addition, we showed that  
453 FIV Vif does not bind zinc, and we are the first to demonstrate that FIV Vif (C36) targets  
454 human or feline Cul5 for degradation by an unknown mechanism. Interestingly, this  
455 phenomenon does not occur with HIV-1 Vif. These results collectively highlight a  
456 complex interplay between antiviral fA3 proteins, FIV Vif, and Cul5 that impacts FIV  
457 infectivity and replication.

458           Cullin proteins have an elongated structure that supports their conformational  
459 flexibility and facilitates binding to a broad range of substrate adaptors, including Vif. Vif  
460 usurps the host's E3-ligase complex (which contains Cul5, Rbx, E2, Elongin B, and  
461 Elongin C) to steer A3 proteins to the proteasome. HIV-1 Vif contains a HCCH domain  
462 that coordinates zinc binding and mediates hCul5 binding (4, 8, 17, 19). However, the  
463 domain of FIV Vif that interacts with the fCul E3 ligase to target the two active anti-FIV  
464 fA3 proteins (fA3Z3 and fA3Z2bZ3) is not known (11). We hypothesized that residues in  
465 the KCCC motif, which has a similar location and composition as the HCCH motif in  
466 HIV-1 Vif, would bind to Cul5.

467           Prior to our studies, it was unknown whether introducing the BC box and KCCC  
468 mutants would disrupt the cytoplasmic distribution of Vif. Toward this end, we performed  
469 confocal microscopy, which showed that the KCCC and BC-box mutants were stably  
470 expressed (Fig 1D) and predominantly distributed in the cytoplasm (Fig 1C) with

471 fA3Z2bZ3 (Fig 1C). The mutants co-localized with fA3Z2bZ3 in the absence of a  
472 proteasome inhibitor (Fig 1C). We believe that these FIV Vif/fA3Z2bZ3 complexes  
473 represent non-degraded populations that are incompletely targeted by the proteasome  
474 (51). We also tested whether previously unreported residues within the FIV Vif BC box  
475 would function similarly to HIV-1 Vif. Our results showed that two FIV Vif BC residues,  
476 TLQ/TAQ and A205L, were unable to target fA3 proteins for degradation (Fig 2A and  
477 2B) as well as the reported TLQ/AAA mutant (48, 51). Interestingly, the A205S mutant  
478 targeted fA3s and partially rescued infectivity (Fig 2A, 2B and 3A). These results are  
479 consistent with the analogous A149S in HIV-1 Vif, which supports HIV-1 infectivity and  
480 hA3Z2g-Z1c elimination (15). In contrast, A205T restored FIV infectivity (Fig 3A), unlike  
481 the analogous A149T mutation in HIV-1 Vif (15). KCCC-domain mutants did not rescue  
482  $\Delta$ vif FIV infectivity in the presence of fA3Z2bZ3 (Fig 3B), which correlates with their  
483 inability to mediate fA3Z2bZ3 degradation in virus-producing cells (Fig 3B). Collectively,  
484 these data support that the cytoplasmic localization of Vif proteins was not perturbed by  
485 mutations in the BC box and KCCC domain. Further, we demonstrated that both  
486 domains are necessary for targeting fA3s for degradation and single-round infectivity.  
487 We also provide data that conserving the alanine at residue 205 significantly contributes  
488 to the ability of FIV Vif to target fA3s for degradation. This finding suggests that the  
489 contact interface between Vif and fA3 proteins may not exactly mimic those within HIV-1  
490 Vif and should be further studied.

491 An earlier report by Wang and colleagues showed that a triple alanine mutation  
492 (TLQ/AAA) and a KCCC/KCSS mutation in FIV Vif were able to block  $\square$ Vif HIV-1  
493 infectivity in human cells. Here, we aimed to determine the impact of FIV infectivity and



494 spreading replication in human and feline cells, respectively. When we expressed a  
495 single-cycle,  $\Delta$ vif reporter virus, FIV infectivity was incompletely restored, despite WT  
496 Vif being expressed in *trans*. Unfortunately, we found that studying FIV Vif  
497 complementation was technically challenging. In our hands,  $\Delta$ vif FIV infectivity in the  
498 presence of ectopically expressed Vif was only restored by 50–70%, despite multiple  
499 attempts to optimize the FIV packaging-VSVG-Vif-A3 plasmid ratios. Previous studies  
500 were able to complement  $\Delta$ Vif FIV infectivity with expression of WT Vif in *trans*;  
501 however, different FIV Vifs that were derived from distinct isolates and packaging  
502 vectors were used (44, 46). Further, Wang and colleagues restored  $\Delta$ vif HIV-1 infectivity  
503 with WT FIV Vif<sub>34TF10</sub> expressed in *trans* (51), while we used FIV<sub>C36</sub> Vif. These  
504 experimental differences may explain the variation in restoring FIV infectivity between  
505 studies. Moreover, our FIV Vif mutants abolished spreading replication in CrFK cells,  
506 with a significant delay in FIV replication kinetics compared to WT Vif. Our data support  
507 previous work showing that  $\Delta$ vif FIV mutants are unable to restore FIV infectivity relative  
508 to WT controls in studies of spreading replication (68, 69). Further, we observed similar  
509 delays in spreading replication in CrFKs compared to peripheral blood mononuclear  
510 cells (PBMCs) derived from domestic cats and co-cultured with CrFK cells infected with  
511  $\Delta$ vif FIV (69). CrFK cells express all fA3 proteins; hence, the delay in spreading WT  
512 replication may have been due to the antiviral activity of fA3 proteins in the absence of  
513 Vif (70). In support of this, all Vif mutant viruses were replication-incompetent, and the  
514 block in replication was sustained over 18 and 40 days at two different MOI (Fig 4C and  
515 4D). Based on these data, the KCCC domain and BC box residues contribute to the  
516 essential function of Vif activity to enable FIV replication. Although, we do not formally

517 show the mechanisms here, presumably our Vif mutants may be unable to overcome  
518 the restriction of fA3 proteins necessary to recruit an E3 ligase Cullin complex to steer  
519 these antiviral proteins to the proteasome.

520 Previously, localization of fCul5 was unknown. We found that fCul5 localizes to  
521 the cytoplasm, similar to hCul5 (Fig 5A), and that WT and mutant Vif proteins co-  
522 localize with Cul5 (Fig 5A). We determined that the BC-box mutant TLQ/AAA has a  
523 reduced interaction with fCul5 and examined whether the KCCC domain served as a  
524 binding motif for fCul5. By co-immunoprecipitation, we found that the KCCC mutants  
525 retained their ability to interact with fCul5 (Fig 5C), demonstrating that the KCCC motif is  
526 not required for the Vif-Cul5 interaction. While we cannot exclude that deleting the  
527 KCCC domain alters proper folding of FIV Vif, the KCCC/RSSS mutant produced similar  
528 results in that the KCCC/RSSS mutant retained its interaction with Cul5.

529 We verified that FIV Vif and fCul5 interact (Fig 5B, lane 5). Interestingly, we  
530 observed reduced fCul5 and hCul5 expression in the presence of WT and FIV Vif  
531 mutants, but not in the presence of HIV-1 Vif (Fig 5B, lanes 4–9). We consistently  
532 observed robust co-immunoprecipitation between HIV-1 Vif and hCul5 (Fig 5C). We  
533 suspect that an unidentified factor that is not expressed in fibroblasts may influence the  
534 stability of the FIV Vif/fCul5 complex.

535 Curiously, fCul5 and hCul5 are 99% homologous (51). However, Wang and  
536 colleagues did not observe reduced fCul5 expression in the presence of codon-  
537 optimized FIV<sub>34TF10</sub> Vif in their interaction studies (51), as we showed with codon-  
538 optimized FIV<sub>C36</sub> Vif in our co-immunoprecipitation studies (Fig 5A). Because the  
539 affinities of these protein-protein interactions are largely unknown, we question whether

540 these two Vif variants differ in their ability to interact with fCul5. hA3s and HIV-1 Vif  
541 require different binding motifs to interact with fA3s and FIV Vif (71). Further, Troy and  
542 colleagues showed that the pathogenicity of FIV depends on the Vif isolate (70), which  
543 might correlate with the interaction, or lack thereof, between FIV<sub>C36</sub> Vif and fCul5. Thus,  
544 our results demonstrate that a single residue within the BC box, TLQ/TAQ or A205L, of  
545 FIV Vif can induce fA3Z3 and fA3Z2bZ3 degradation, and that the KCCC motif does not  
546 mediate the interaction between fCul5 and FIV Vif.

547         Lastly, our biochemical ITC data showed that the KCCC domain of FIV Vif does  
548 not bind zinc (Fig 7B). We were unable to express a purified form of the full-length FIV  
549 Vif protein (Fig 6D), because purifying Vif is technically challenging (37, 72, 73).  
550 Nonetheless, our finding that FIV Vif does not bind to zinc agrees with studies of the  
551 PTEN zinc chelator carried out by Wang and colleagues (51). However, this result  
552 contrasts with the zinc binding we observed for HIV-1 Vif using ITC (59). Zinc binding to  
553 HIV-1 Vif changes the protein conformation and promotes interaction with Cul5. In the  
554 case of FIV Vif, such a conformational change is either not required or driven by other  
555 processes. Curiously, non-primate lentiviral BIV Vif requires zinc and has a novel zinc-  
556 binding domain, C-x1-C-x1-H-x19-C. Visna Vif, however, does not use zinc for its  
557 activity, but rather relies on a novel protein-protein interaction (74, 75).

558         While we were preparing this manuscript, Kane and colleagues showed that  
559 FIV<sub>34TF10</sub> Vif interacts with both hCul2 and hCul5, albeit its binding to hCul2 requires the  
560 Vif N-terminal tag (75). Recruitment of Cul5 is mediated by the N-terminus of HIV-1 Vif  
561 (76), and stabilization between primate Vifs and Cul5 requires CBF- $\beta$ , which targets  
562 hA3Z2g-Z1c for proteasomal degradation (27, 39, 72). Interestingly, FIV Vif does not

563 require CBF- $\beta$  to stabilize Vif, form the fE3-ligase complex, or mediate fA3-mediated  
564 degradation (39, 75), despite the identical homology between feline and human CBF- $\beta$   
565 (75). A non-primate Visna Vif has evolved to use a novel cellular co-factor, Cylophilin A,  
566 to promote the Visna Vif/Cul2 E3-ligase complex needed to degrade ovine A3 proteins,  
567 whereas BIV Vif does not require a co-factor to eliminate bovine A3 via the proteasome  
568 (75).

569         These studies illustrate the complex selection criteria that lentiviruses have  
570 undergone to allow species-specific Vif to adapt to host A3 proteins (71, 75, 77, 78). We  
571 hypothesize that the domestic cat may have flexible fCul2/fCul5 usage, unlike HIV-1 Vif,  
572 which predominantly interacts with hCul5. The reported study by Kane and colleagues  
573 focused on the FIV Vif–host interactome in human 293T cells (75). However, further  
574 studies in feline cells should determine whether Vif preferentially binds fCul2 or fCul5,  
575 examine if other feline Cullins interact with FIV Vif, and identify the elusive cellular co-  
576 factor that stabilizes FIV Vif. Based on our results, we believe that the lentiviral/host  
577 interactome hijacks novel cellular co-factors needed to eliminate the antiviral properties  
578 of A3 proteins, as is the case with FIV Vif, despite 100% homology between human and  
579 feline CBF- $\beta$  (75). Data from these studies may serve as a platform for future  
580 experiments to provide mechanistic insight important for the development of novel  
581 antiviral HIV-1 therapies.

582

583

584 **Acknowledgments.** We thank Dyana Saenz, and Mary Peretz for technical assistance  
585 and advice; Anne Meehan, James Morrison, and Hind Fadel for advice; Xiao Fang Yu  
586 (Johns Hopkins) and Jiawen Wang (Jilin University) for expression plasmids; and P.  
587 Barr (Western University of Health Sciences) for antisera. Supported by NIH AI100797.

588

## 589    **References**

- 590    1.    Oberste MS, Gonda MA. Conservation of amino-acid sequence motifs in  
591    lentivirus Vif proteins. *Virus Genes*. 1992;6(1):95-102.
- 592    2.    Yu X, Yu Y, Liu B, Luo K, Kong W, Mao P, et al. Induction of APOBEC3G  
593    ubiquitination and degradation by an HIV-1 Vif-Cul5-SCF complex. *Science*.  
594    2003;302(5647):1056-60.
- 595    3.    Yu Q, Konig R, Pillai S, Chiles K, Kearney M, Palmer S, et al. Single-strand  
596    specificity of APOBEC3G accounts for minus-strand deamination of the HIV genome.  
597    *Nat Struct Mol Biol*. 2004;11(5):435-42.
- 598    4.    Sheehy AM, Gaddis NC, Choi JD, Malim MH. Isolation of a human gene that  
599    inhibits HIV-1 infection and is suppressed by the viral Vif protein. *Nature*.  
600    2002;418(6898):646-50.
- 601    5.    Mehle A, Goncalves J, Santa-Marta M, McPike M, Gabuzda D. Phosphorylation  
602    of a novel SOCS-box regulates assembly of the HIV-1 Vif-Cul5 complex that promotes  
603    APOBEC3G degradation. *Genes Dev*. 2004;18(23):2861-6.
- 604    6.    Luo K, Xiao Z, Ehrlich E, Yu Y, Liu B, Zheng S, et al. Primate lentiviral virion  
605    infectivity factors are substrate receptors that assemble with cullin 5-E3 ligase through a  
606    HCCH motif to suppress APOBEC3G. *Proc Natl Acad Sci U S A*. 2005;102(32):11444-  
607    9.
- 608    7.    Xiao Z, Ehrlich E, Yu Y, Luo K, Wang T, Tian C, et al. Assembly of HIV-1 Vif-  
609    Cul5 E3 ubiquitin ligase through a novel zinc-binding domain-stabilized hydrophobic  
610    interface in Vif. *Virology*. 2006;349(2):290-9.
- 611    8.    Mehle A, Thomas ER, Rajendran KS, Gabuzda D. A zinc-binding region in Vif  
612    binds Cul5 and determines cullin selection. *J Biol Chem*. 2006;281(25):17259-65.
- 613    9.    Xiao Z, Ehrlich E, Luo K, Xiong Y, Yu XF. Zinc chelation inhibits HIV Vif activity  
614    and liberates antiviral function of the cytidine deaminase APOBEC3G. *FASEB J*.  
615    2007;21(1):217-22.
- 616    10.    Chiu YL, Greene WC. The APOBEC3 cytidine deaminases: an innate defensive  
617    network opposing exogenous retroviruses and endogenous retroelements. *Annu Rev*  
618    *Immunol*. 2008;26:317-53.
- 619    11.    LaRue RS, Andresdottir V, Blanchard Y, Conticello SG, Derse D, Emerman M, et  
620    al. Guidelines for naming nonprimate APOBEC3 genes and proteins. *J Virol*.  
621    2009;83(2):494-7.
- 622    12.    Mangeat B, Turelli P, Caron G, Friedli M, Perrin L, Trono D. Broad antiretroviral  
623    defence by human APOBEC3G through lethal editing of nascent reverse transcripts.  
624    *Nature*. 2003;424(6944):99-103.
- 625    13.    Mariani R, Chen D, Schrofelbauer B, Navarro F, Konig R, Bollman B, et al.  
626    Species-specific exclusion of APOBEC3G from HIV-1 virions by Vif. *Cell*.  
627    2003;114(1):21-31.
- 628    14.    Zhang H, Yang B, Pomerantz RJ, Zhang C, Arunachalam SC, Gao L. The  
629    cytidine deaminase CEM15 induces hypermutation in newly synthesized HIV-1 DNA.  
630    *Nature*. 2003;424(6944):94-8.

- 631 15. Yu Y, Xiao Z, Ehrlich ES, Yu X, Yu XF. Selective assembly of HIV-1 Vif-Cul5-  
632 ElonginB-ElonginC E3 ubiquitin ligase complex through a novel SOCS box and  
633 upstream cysteines. *Genes Dev.* 2004;18(23):2867-72.
- 634 16. Conticello SG, Harris RS, Neuberger MS. The Vif protein of HIV triggers  
635 degradation of the human antiretroviral DNA deaminase APOBEC3G. *Curr Biol.*  
636 2003;13(22):2009-13.
- 637 17. Marin M, Rose KM, Kozak SL, Kabat D. HIV-1 Vif protein binds the editing  
638 enzyme APOBEC3G and induces its degradation. *Nat Med.* 2003;9(11):1398-403.
- 639 18. Sheehy AM, Gaddis NC, Malim MH. The antiretroviral enzyme APOBEC3G is  
640 degraded by the proteasome in response to HIV-1 Vif. *Nat Med.* 2003;9(11):1404-7.
- 641 19. Stopak K, de Noronha C, Yonemoto W, Greene WC. HIV-1 Vif blocks the  
642 antiviral activity of APOBEC3G by impairing both its translation and intracellular stability.  
643 *Mol Cell.* 2003;12(3):591-601.
- 644 20. Mehle A, Strack B, Ancuta P, Zhang C, McPike M, Gabuzda D. Vif overcomes  
645 the innate antiviral activity of APOBEC3G by promoting its degradation in the ubiquitin-  
646 proteasome pathway. *J Biol Chem.* 2004;279(9):7792-8.
- 647 21. Kobayashi M, Takaori-Kondo A, Miyauchi Y, Iwai K, Uchiyama T. Ubiquitination  
648 of APOBEC3G by an HIV-1 Vif-Cullin5-Elongin B-Elongin C complex is essential for Vif  
649 function. *J Biol Chem.* 2005;280(19):18573-8.
- 650 22. Mercenne G, Bernacchi S, Richer D, Bec G, Henriet S, Paillart JC, et al. HIV-1  
651 Vif binds to APOBEC3G mRNA and inhibits its translation. *Nucleic Acids Res.*  
652 2010;38(2):633-46.
- 653 23. Simon V, Zennou V, Murray D, Huang Y, Ho DD, Bieniasz PD. Natural variation  
654 in Vif: differential impact on APOBEC3G/3F and a potential role in HIV-1 diversification.  
655 *PLoS Pathog.* 2005;1(1):e6.
- 656 24. Tian C, Yu X, Zhang W, Wang T, Xu R, Yu XF. Differential requirement for  
657 conserved tryptophans in human immunodeficiency virus type 1 Vif for the selective  
658 suppression of APOBEC3G and APOBEC3F. *J Virol.* 2006;80(6):3112-5.
- 659 25. Russell RA, Pathak VK. Identification of two distinct human immunodeficiency  
660 virus type 1 Vif determinants critical for interactions with human APOBEC3G and  
661 APOBEC3F. *J Virol.* 2007;81(15):8201-10.
- 662 26. Schrofelbauer B, Senger T, Manning G, Landau NR. Mutational alteration of  
663 human immunodeficiency virus type 1 Vif allows for functional interaction with  
664 nonhuman primate APOBEC3G. *J Virol.* 2006;80(12):5984-91.
- 665 27. Jager S, Kim DY, Hultquist JF, Shindo K, LaRue RS, Kwon E, et al. Vif hijacks  
666 CBF-beta to degrade APOBEC3G and promote HIV-1 infection. *Nature.*  
667 2012;481(7381):371-5.
- 668 28. Giri K, Scott RA, Maynard EL. Molecular structure and biochemical properties of  
669 the HCCH-Zn<sup>2+</sup> site in HIV-1 Vif. *Biochemistry.* 2009;48(33):7969-78.
- 670 29. Paul I, Cui J, Maynard EL. Zinc binding to the HCCH motif of HIV-1 virion  
671 infectivity factor induces a conformational change that mediates protein-protein  
672 interactions. *Proc Natl Acad Sci U S A.* 2006;103(49):18475-80.
- 673 30. Stanley BJ, Ehrlich ES, Short L, Yu Y, Xiao Z, Yu XF, et al. Structural insight into  
674 the human immunodeficiency virus Vif SOCS box and its role in human E3 ubiquitin  
675 ligase assembly. *J Virol.* 2008;82(17):8656-63.



- 676 31. Bergeron JR, Huthoff H, Veselkov DA, Beavil RL, Simpson PJ, Matthews SJ, et  
677 al. The SOCS-box of HIV-1 Vif interacts with ElonginBC by induced-folding to recruit its  
678 Cul5-containing ubiquitin ligase complex. *PLoS Pathog.* 2010;6(6):e1000925.
- 679 32. Petroski MD, Deshaies RJ. Function and regulation of cullin-RING ubiquitin  
680 ligases. *Nat Rev Mol Cell Biol.* 2005;6(1):9-20.
- 681 33. Sarikas A, Hartmann T, Pan ZQ. The cullin protein family. *Genome Biol.*  
682 2011;12(4):220.
- 683 34. Han X, Liang W, Hua D, Zhou X, Du J, Evans SL, et al. Evolutionarily conserved  
684 requirement for core binding factor beta in the assembly of the human  
685 immunodeficiency virus/simian immunodeficiency virus Vif-cullin 5-RING E3 ubiquitin  
686 ligase. *J Virol.* 2014;88(6):3320-8.
- 687 35. Fribourgh JL, Nguyen HC, Wolfe LS, Dewitt DC, Zhang W, Yu XF, et al. Core  
688 binding factor beta plays a critical role by facilitating the assembly of the Vif-cullin 5 E3  
689 ubiquitin ligase. *J Virol.* 2014;88(6):3309-19.
- 690 36. Miyagi E, Kao S, Yedavalli V, Strebel K. CBFbeta enhances de novo protein  
691 biosynthesis of its binding partners HIV-1 Vif and RUNX1 and potentiates the Vif-  
692 induced degradation of APOBEC3G. *J Virol.* 2014;88(9):4839-52.
- 693 37. Guo Y, Dong L, Qiu X, Wang Y, Zhang B, Liu H, et al. Structural basis for  
694 hijacking CBF-beta and CUL5 E3 ligase complex by HIV-1 Vif. *Nature.*  
695 2014;505(7482):229-33.
- 696 38. Salter JD, Lippa GM, Belashov IA, Wedekind JE. Core-binding factor beta  
697 increases the affinity between human Cullin 5 and HIV-1 Vif within an E3 ligase  
698 complex. *Biochemistry.* 2012;51(44):8702-4.
- 699 39. Hultquist JF, Binka M, LaRue RS, Simon V, Harris RS. Vif proteins of human and  
700 simian immunodeficiency viruses require cellular CBFbeta to degrade APOBEC3  
701 restriction factors. *J Virol.* 2012;86(5):2874-7.
- 702 40. Kouno T, Luengas EM, Shigematsu M, Shandilya SM, Zhang J, Chen L, et al.  
703 Structure of the Vif-binding domain of the antiviral enzyme APOBEC3G. *Nat Struct Mol*  
704 *Biol.* 2015;22(6):485-91.
- 705 41. Wang H, Lv G, Zhou X, Li Z, Liu X, Yu XF, et al. Requirement of HIV-1 Vif C-  
706 terminus for Vif-CBF-beta interaction and assembly of CUL5-containing E3 ligase. *BMC*  
707 *Microbiol.* 2014;14:290.
- 708 42. Wang X, Wang X, Zhang H, Lv M, Zuo T, Wu H, et al. Interactions between HIV-  
709 1 Vif and human ElonginB-ElonginC are important for CBF-beta binding to Vif.  
710 *Retrovirology.* 2013;10:94.
- 711 43. Munk C, Zielonka J, Constabel H, Kloke BP, Rengstl B, Battenberg M, et al.  
712 Multiple restrictions of human immunodeficiency virus type 1 in feline cells. *J Virol.*  
713 2007;81(13):7048-60.
- 714 44. Munk C, Beck T, Zielonka J, Hotz-Wagenblatt A, Chareza S, Battenberg M, et al.  
715 Functions, structure, and read-through alternative splicing of feline APOBEC3 genes.  
716 *Genome Biol.* 2008;9(3):R48.
- 717 45. Stern MA, Hu C, Saenz DT, Fadel HJ, Sims O, Peretz M, et al. Productive  
718 replication of Vif-chimeric HIV-1 in feline cells. *J Virol.* 2010;84(14):7378-95.
- 719 46. Zielonka J, Marino D, Hofmann H, Yuhki N, Lochelt M, Munk C. Vif of feline  
720 immunodeficiency virus from domestic cats protects against APOBEC3 restriction  
721 factors from many felids. *J Virol.* 2010;84(14):7312-24.



- 722 47. LaRue RS, Jonsson SR, Silverstein KA, Lajoie M, Bertrand D, El-Mabrouk N, et  
723 al. The artiodactyl APOBEC3 innate immune repertoire shows evidence for a multi-  
724 functional domain organization that existed in the ancestor of placental mammals. *BMC*  
725 *Mol Biol*. 2008;9:104.
- 726 48. Larue RS, Lengyel J, Jonsson SR, Andresdottir V, Harris RS. Lentiviral Vif  
727 degrades the APOBEC3Z3/APOBEC3H protein of its mammalian host and is capable of  
728 cross-species activity. *J Virol*. 2010;84(16):8193-201.
- 729 49. Fadel HJ, Poeschla EM. Retroviral restriction and dependency factors in  
730 primates and carnivores. *Vet Immunol Immunopathol*. 2011;143(3-4):179-89.
- 731 50. Fadel HJ, Saenz DT, Guevara R, von Messling V, Peretz M, Poeschla EM.  
732 Productive replication and evolution of HIV-1 in ferret cells. *J Virol*. 2012;86(4):2312-22.
- 733 51. Wang J, Zhang W, Lv M, Zuo T, Kong W, Yu X. Identification of a Cullin5-  
734 ElonginB-ElonginC E3 complex in degradation of feline immunodeficiency virus Vif-  
735 mediated feline APOBEC3 proteins. *J Virol*. 2011;85(23):12482-91.
- 736 52. Guo J, Wu T, Anderson J, Kane BF, Johnson DG, Gorelick RJ, et al. Zinc finger  
737 structures in the human immunodeficiency virus type 1 nucleocapsid protein facilitate  
738 efficient minus- and plus-strand transfer. *J Virol*. 2000;74(19):8980-8.
- 739 53. Krishna SS, Majumdar I, Grishin NV. Structural classification of zinc fingers:  
740 survey and summary. *Nucleic Acids Res*. 2003;31(2):532-50.
- 741 54. Laity JH, Lee BM, Wright PE. Zinc finger proteins: new insights into structural  
742 and functional diversity. *Curr Opin Struct Biol*. 2001;11(1):39-46.
- 743 55. Haas KL, Franz KJ. Application of metal coordination chemistry to explore and  
744 manipulate cell biology. *Chem Rev*. 2009;109(10):4921-60.
- 745 56. Hashemi M, Ghavami S, Eshraghi M, Booy EP, Los M. Cytotoxic effects of intra  
746 and extracellular zinc chelation on human breast cancer cells. *Eur J Pharmacol*.  
747 2007;557(1):9-19.
- 748 57. Sigdel TK, Easton JA, Crowder MW. Transcriptional response of *Escherichia coli*  
749 to TPEN. *J Bacteriol*. 2006;188(18):6709-13.
- 750 58. Poeschla EM, Wong-Staal F, Looney DJ. Efficient transduction of nondividing  
751 human cells by feline immunodeficiency virus lentiviral vectors. *Nat Med*. 1998;4(3):354-  
752 7.
- 753 59. Ghimire-Rijal S, Maynard EL, Jr. Comparative thermodynamic analysis of zinc  
754 binding to the His/Cys motif in virion infectivity factor. *Inorg Chem*. 2014;53(9):4295-  
755 302.
- 756 60. Llano M, Saenz DT, Meehan A, Wongthida P, Peretz M, Walker WH, et al. An  
757 essential role for LEDGF/p75 in HIV integration. *Science*. 2006;314(5798):461-4.
- 758 61. Loewen N, Barraza R, Whitwam T, Saenz DT, Kemler I, Poeschla EM. FIV  
759 Vectors. *Methods Mol Biol*. 2003;229:251-71.
- 760 62. Saenz DT, Teo W, Olsen JC, Poeschla EM. Restriction of feline  
761 immunodeficiency virus by Ref1, Lv1, and primate TRIM5alpha proteins. *J Virol*.  
762 2005;79(24):15175-88.
- 763 63. de Parseval A, Chatterji U, Morris G, Sun P, Olson AJ, Elder JH. Structural  
764 mapping of CD134 residues critical for interaction with feline immunodeficiency virus.  
765 *Nat Struct Mol Biol*. 2005;12(1):60-6.
- 766 64. Baig TT, Feng Y, Chelico L. Determinants of efficient degradation of APOBEC3  
767 restriction factors by HIV-1 Vif. *J Virol*. 2014;88(24):14380-95.

- 768 65. Chatterji U, Grant CK, Elder JH. Feline immunodeficiency virus Vif localizes to  
769 the nucleus. *J Virol.* 2000;74(6):2533-40.
- 770 66. Farrow MA, Somasundaran M, Zhang C, Gabuzda D, Sullivan JL, Greenough  
771 TC. Nuclear localization of HIV type 1 Vif isolated from a long-term asymptomatic  
772 individual and potential role in virus attenuation. *AIDS Res Hum Retroviruses.*  
773 2005;21(6):565-74.
- 774 67. Tanaka M, Komi Y. Layers of structure and function in protein aggregation. *Nat*  
775 *Chem Biol.* 2015;11(6):373-7.
- 776 68. Shen X, Leutenegger CM, Stefano Cole K, Pedersen NC, Sparger EE. A feline  
777 immunodeficiency virus vif-deletion mutant remains attenuated upon infection of  
778 newborn kittens. *J Gen Virol.* 2007;88(Pt 10):2793-9.
- 779 69. Lockridge KM, Himathongkham S, Sawai ET, Chienand M, Sparger EE. The  
780 feline immunodeficiency virus vif gene is required for productive infection of feline  
781 peripheral blood mononuclear cells and monocyte-derived macrophages. *Virology.*  
782 1999;261(1):25-30.
- 783 70. Troyer RM, Thompson J, Elder JH, VandeWoude S. Accessory genes confer a  
784 high replication rate to virulent feline immunodeficiency virus. *J Virol.* 2013;87(14):7940-  
785 51.
- 786 71. Zhang Z, Gu Q, Jaguva Vasudevan AA, Hain A, Kloke BP, Hasheminasab S, et  
787 al. Determinants of FIV and HIV Vif sensitivity of feline APOBEC3 restriction factors.  
788 *Retrovirology.* 2016;13(1):46.
- 789 72. Zhang W, Du J, Evans SL, Yu Y, Yu XF. T-cell differentiation factor CBF-beta  
790 regulates HIV-1 Vif-mediated evasion of host restriction. *Nature.* 2012;481(7381):376-9.
- 791 73. Reingewertz TH, Benyamini H, Lebediker M, Shalev DE, Friedler A. The C-  
792 terminal domain of the HIV-1 Vif protein is natively unfolded in its unbound state. *Protein*  
793 *Eng Des Sel.* 2009;22(5):281-7.
- 794 74. Zhang J, Wu J, Wang W, Wu H, Yu B, Wang J, et al. Role of cullin-elonginB-  
795 elonginC E3 complex in bovine immunodeficiency virus and maedi-visna virus Vif-  
796 mediated degradation of host A3Z2-Z3 proteins. *Retrovirology.* 2014;11:77.
- 797 75. Kane JR, Stanley DJ, Hultquist JF, Johnson JR, Mietrach N, Binning JM, et al.  
798 Lineage-Specific Viral Hijacking of Non-canonical E3 Ubiquitin Ligase Cofactors in the  
799 Evolution of Vif Anti-APOBEC3 Activity. *Cell Rep.* 2015;11(8):1236-50.
- 800 76. Evans SL, Schon A, Gao Q, Han X, Zhou X, Freire E, et al. HIV-1 Vif N-terminal  
801 motif is required for recruitment of Cul5 to suppress APOBEC3. *Retrovirology.*  
802 2014;11:4.
- 803 77. Ai Y, Zhu D, Wang C, Su C, Ma J, Ma J, et al. Core-binding factor subunit beta is  
804 not required for non-primate lentiviral Vif-mediated APOBEC3 degradation. *J Virol.*  
805 2014;88(20):12112-22.
- 806 78. Yoshikawa R, Nakano Y, Yamada E, Izumi T, Misawa N, Koyanagi Y, et al.  
807 Species-specific differences in the ability of feline lentiviral Vif to degrade feline  
808 APOBEC3 proteins. *Microbiol Immunol.* 2016;60(4):272-9.
- 809
- 810
- 811

**A**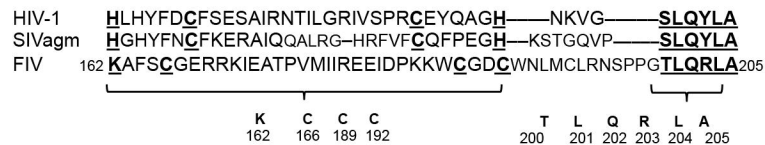**B**

|                  | K        | C        | C        | C        | T        | L        | Q        | R   | L   | A        |                |
|------------------|----------|----------|----------|----------|----------|----------|----------|-----|-----|----------|----------------|
|                  | 162      | 166      | 189      | 192      | 200      | 201      | 202      | 203 | 204 | 205      |                |
| <b>Mutations</b> | <b>B</b> | C        | C        | C        | <b>A</b> | <b>A</b> | <b>A</b> | R   | L   | A        | <b>TLQ/AAA</b> |
| <b>K162R</b>     | 162      | 166      | 189      | 192      | 200      | 201      | 202      | 203 | 204 | 205      |                |
| <b>C166S</b>     | K        | <b>S</b> | C        | C        | T        | <b>A</b> | Q        | R   | L   | A        | <b>L201A</b>   |
| <b>C189S</b>     | 162      | 166      | <b>S</b> | 192      | 200      | 201      | 202      | 203 | 204 | 205      | <b>A205L</b>   |
|                  | K        | C        | <b>S</b> | C        | T        | L        | Q        | R   | L   | L        |                |
| <b>C192S</b>     | 162      | 166      | 189      | 192      | 200      | 201      | 202      | 203 | 204 | 205      | <b>A205S</b>   |
|                  | K        | C        | C        | <b>S</b> | T        | L        | Q        | R   | L   | <b>S</b> |                |
| <b>KCCC/RSSS</b> | 162      | 166      | 189      | 192      | 200      | 201      | 202      | 203 | 204 | 205      | <b>A205T</b>   |
|                  | R        | <b>S</b> | <b>S</b> | <b>S</b> | T        | L        | Q        | R   | L   | <b>T</b> |                |
|                  | 162      | 166      | 189      | 192      | 200      | 201      | 202      | 203 | 204 | 205      |                |

**ΔKCCC**  
Deletion 162-192

**C**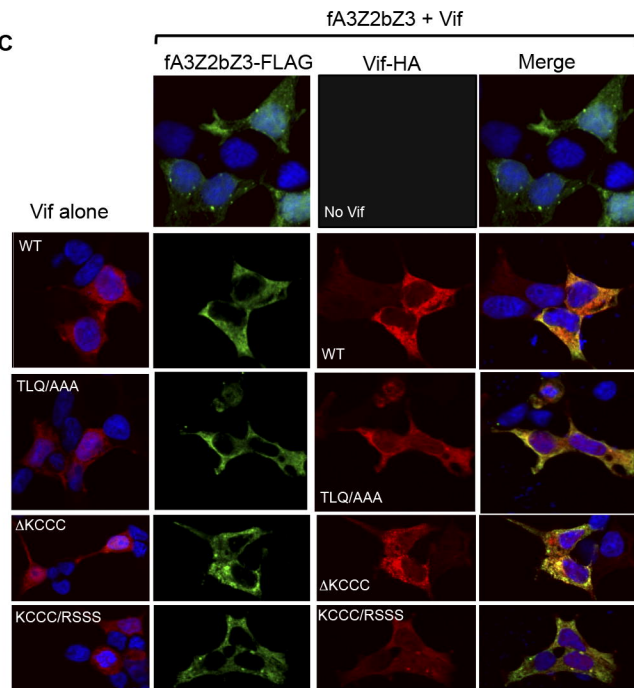**D**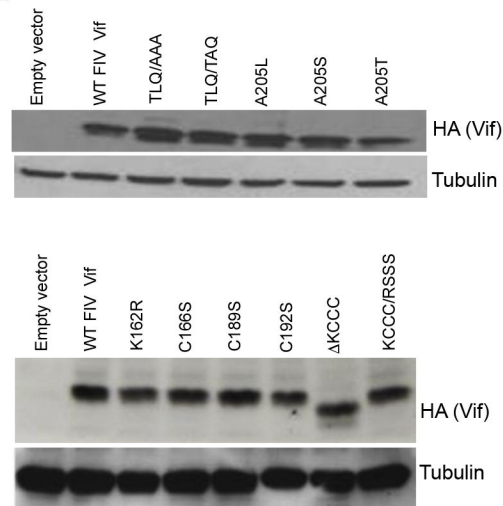

Fig. 1

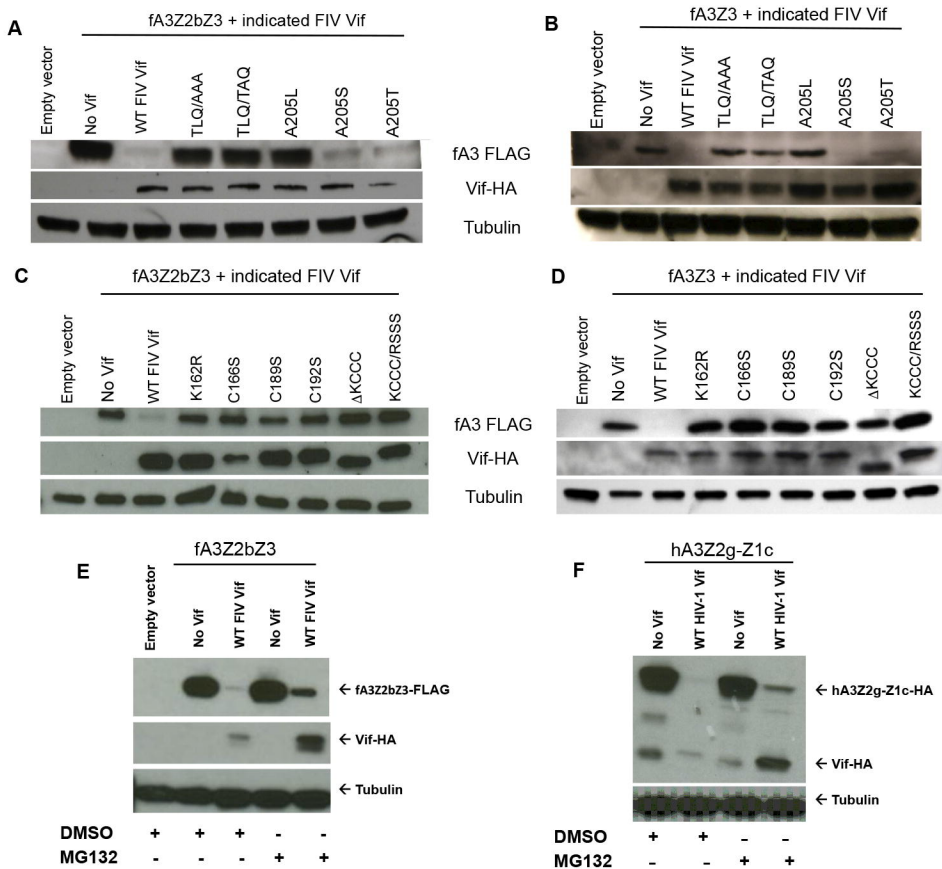

Fig. 2

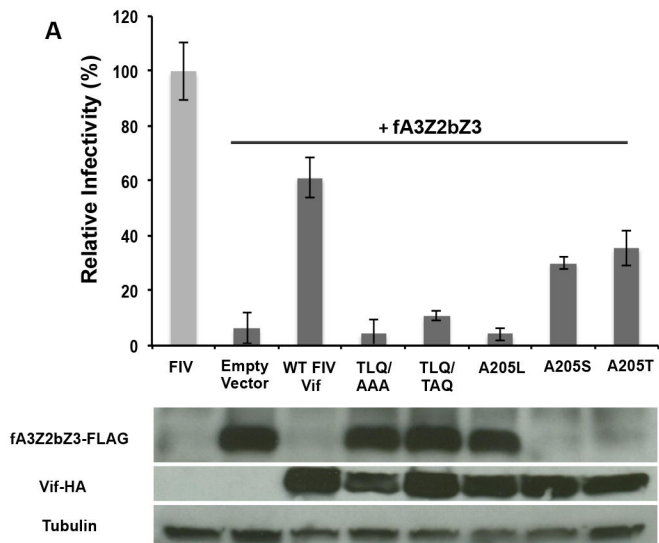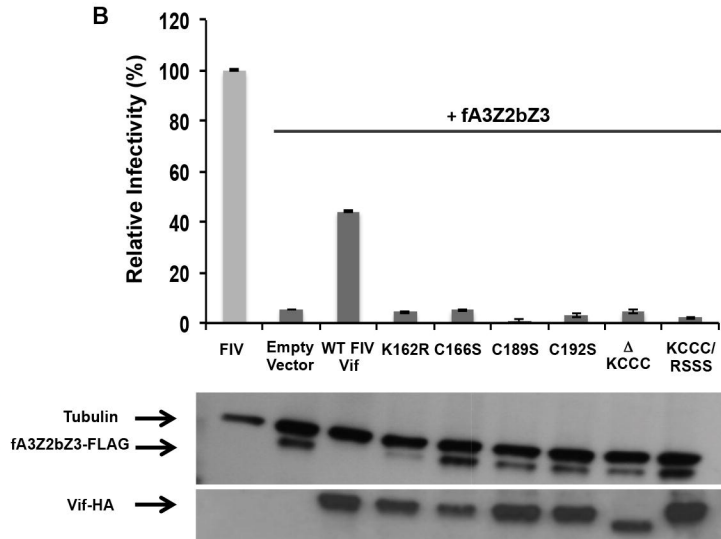

Fig. 3

**A**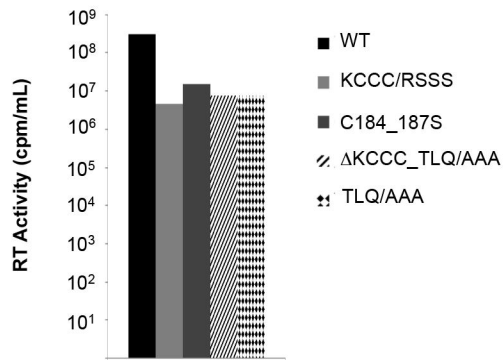**B**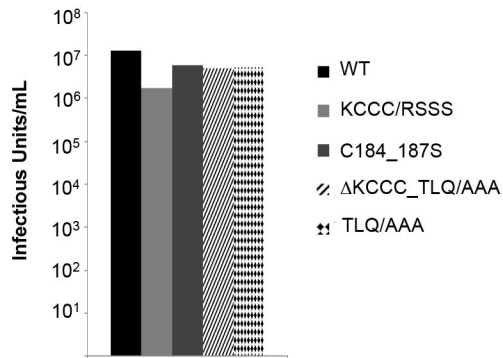**C**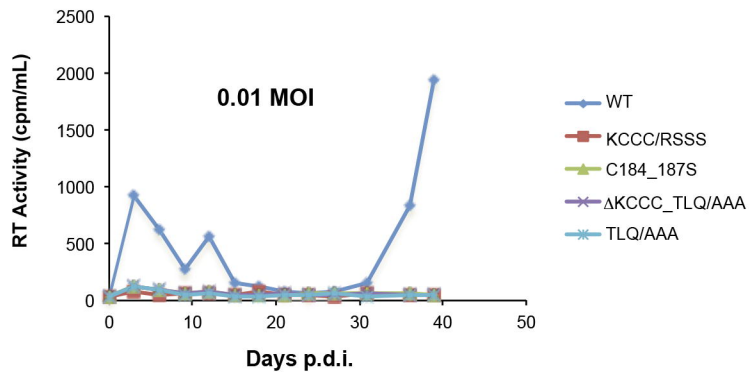**D**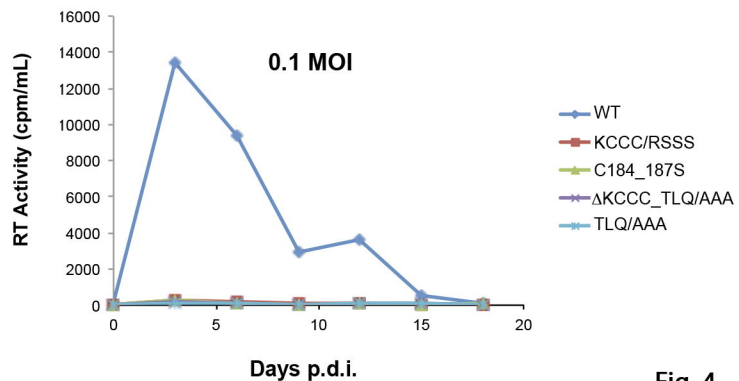**Fig. 4**

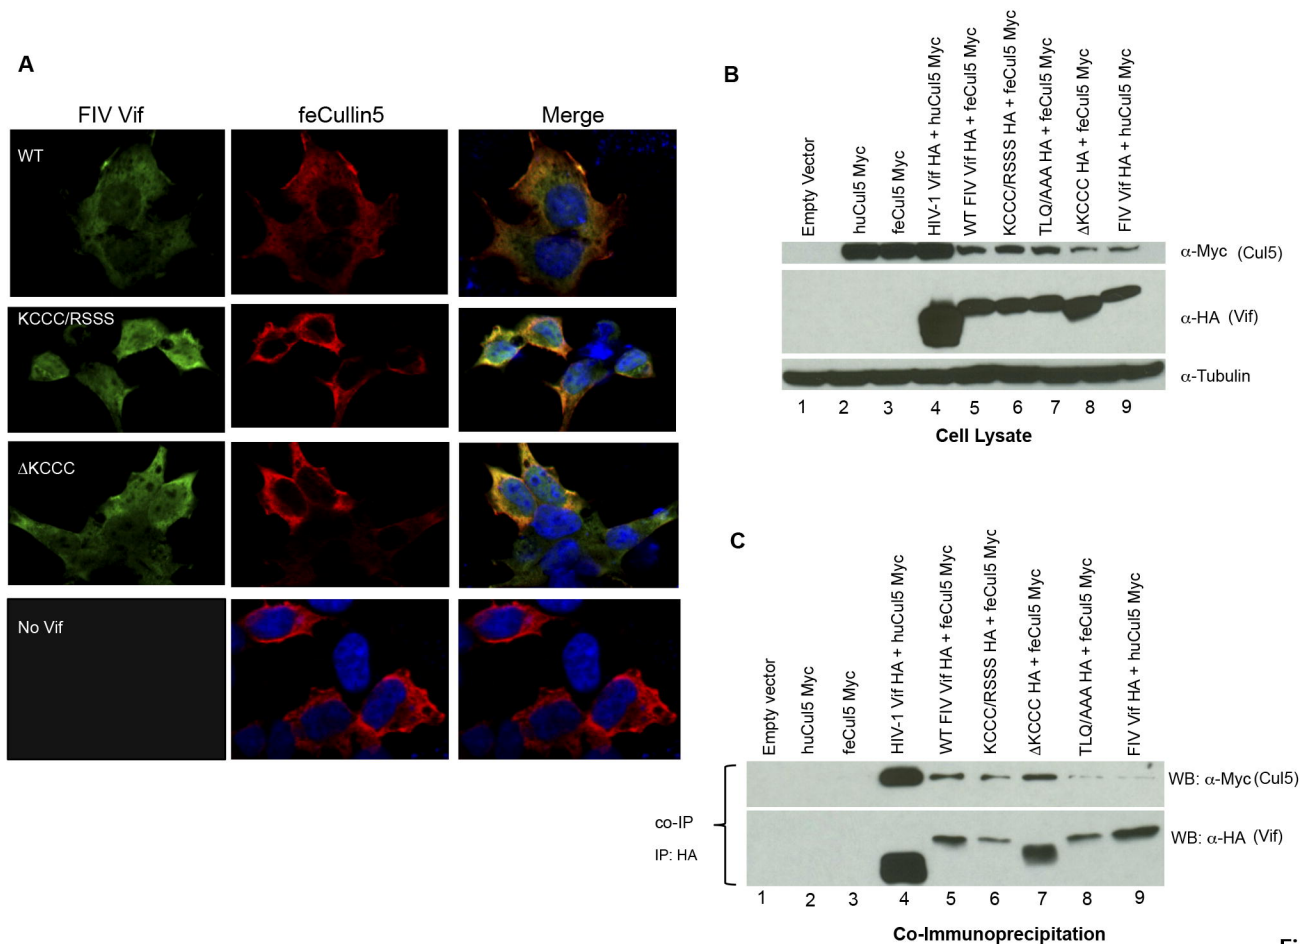

Fig. 5



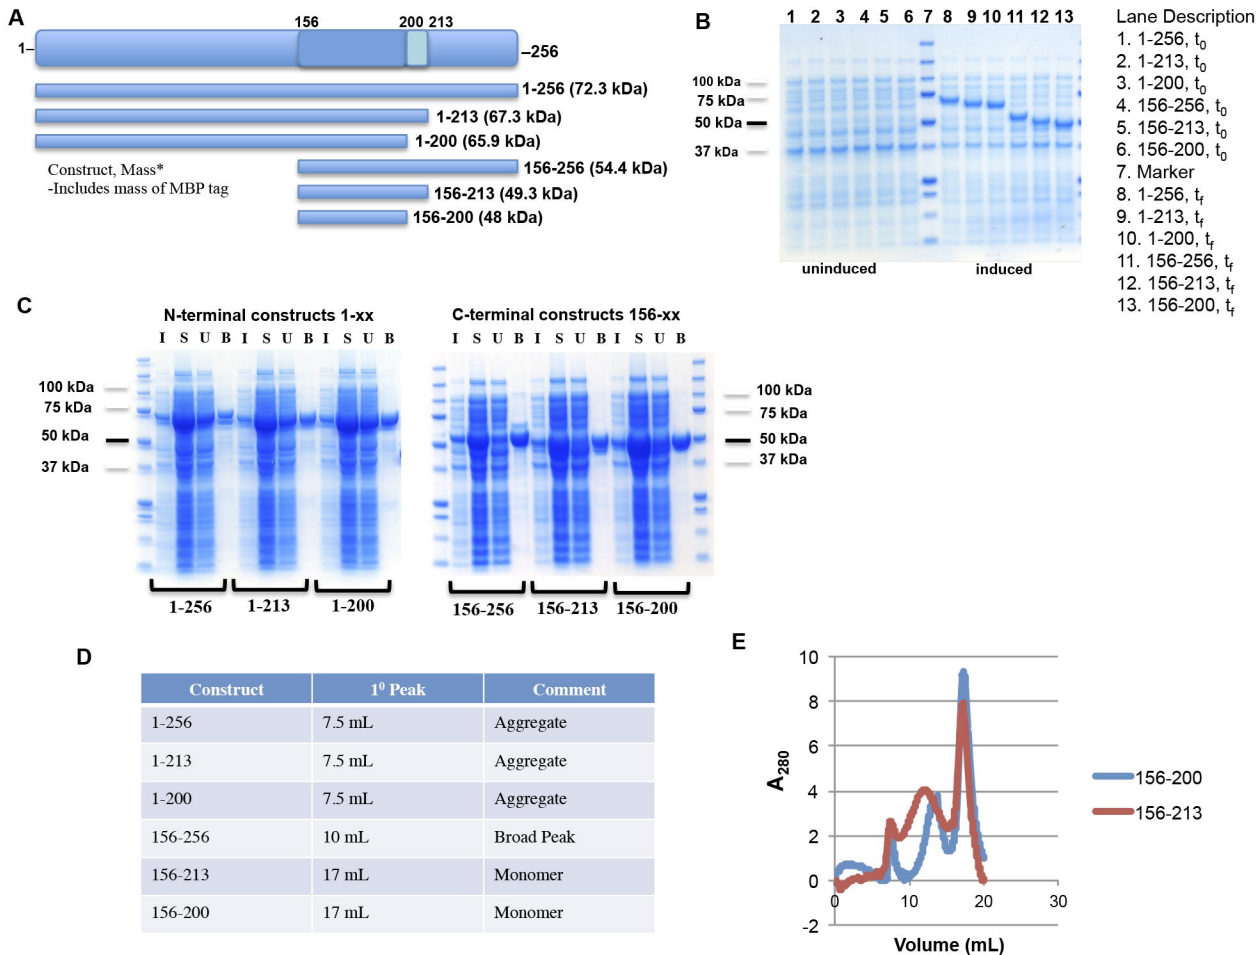

Fig. 6



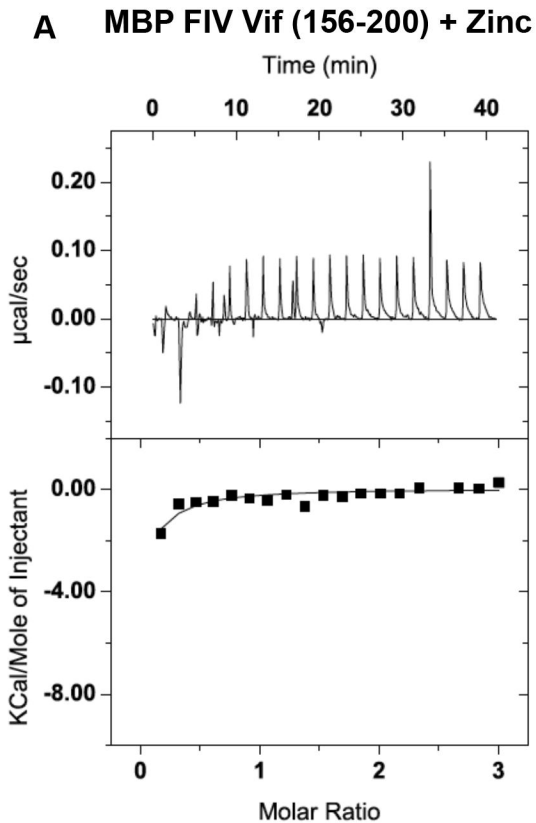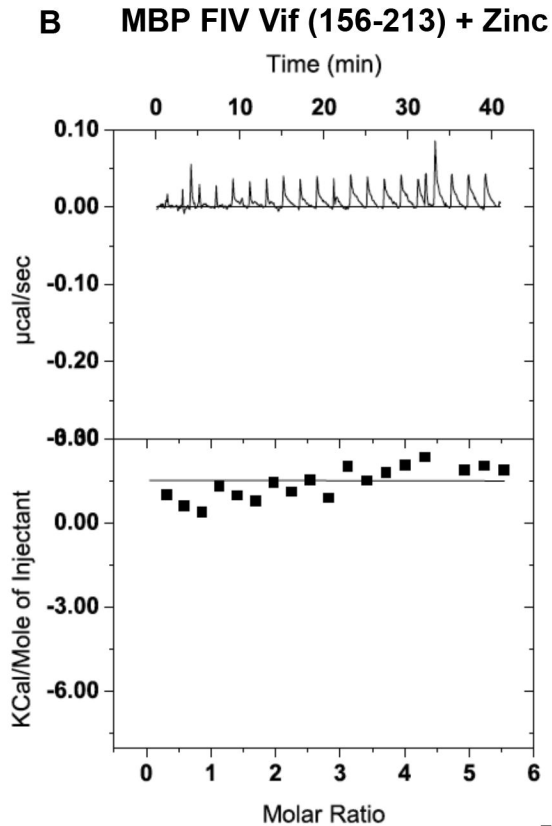

Fig. 7
